# Supplementary material for: Systematic review of the Exploration, Preparation, Implementation, Sustainment (EPIS) framework
Source: Springer Nature journal article supplement (doi:10.1186/s13012-018-0842-6), 2019-01-05
Supplement: MOESM1 [file 16379154]

**Additional File 1: Data Extraction**

| Project | Authors                                       | Year | Objective                                                                                                                                                                                                                                                       | Country | Setting                                                                                                                        | Sector                                                                          | EBP, Innovation or Intervention | Health focus reported (y/n) | Study design                                                                               | Study methodology | Larger Study Design | Type of EPIS use                                                                    | Level of data collection                   | Level of analysis                             | Outer context (y/n) | Inner context (y/n) | Innovation factors (y/n) | Bridging factors (y/n) | Imp Strategy (y/n) | Imp Strategy Reported (y/n) | Implement. Outcomes                                | Exploration | Preparation | Implementation | Sustainment | Depth (1: conceptual to 5: operational) |
|---------|-----------------------------------------------|------|-----------------------------------------------------------------------------------------------------------------------------------------------------------------------------------------------------------------------------------------------------------------|---------|--------------------------------------------------------------------------------------------------------------------------------|---------------------------------------------------------------------------------|---------------------------------|-----------------------------|--------------------------------------------------------------------------------------------|-------------------|---------------------|-------------------------------------------------------------------------------------|--------------------------------------------|-----------------------------------------------|---------------------|---------------------|--------------------------|------------------------|--------------------|-----------------------------|----------------------------------------------------|-------------|-------------|----------------|-------------|-----------------------------------------|
|         |                                               |      |                                                                                                                                                                                                                                                                 |         |                                                                                                                                |                                                                                 |                                 |                             |                                                                                            |                   |                     |                                                                                     |                                            |                                               |                     |                     |                          |                        |                    |                             |                                                    |             |             |                |             |                                         |
| 1       |                                               |      | Examine the statewide implementation of an EBI. Study looked at impact on key provider characteristics, the influence of leadership and leader member exchange on implementation climate and use of mixed-methods as a methodology for implementation research. | USA     | Statewide network of private nonprofit community based mental health and social service provider organizations in one US state | Child welfare                                                                   | SafeCare <sup>a</sup>           | N                           | Prospective, longitudinal 2 x 2 hybrid design RCT                                          | Mixed methods     |                     | Study framing, measurement, analysis, reporting                                     | Multiple level outer and inner context     | System, organizational, supervisors, provider | N                   | Y                   | N                        | N                      | Y                  | Y                           | Fidelity, implementation, maintenance              | 0           | 0           | 2              | 1           | 3                                       |
|         | Aarons GA, Fettes DL, Sommerfeld DH et al.[1] | 2012 | Mixed Methods for Implementation Research: Application to Evidence-Based Practice Implementation and Staff Turnover in Community-Based Organizations Providing Child Welfare Services                                                                           | USA     | Statewide network of private nonprofit community based mental health and social service provider organizations in one US state | Child welfare                                                                   | SafeCare <sup>a</sup>           | N                           | Prospective, implementation RCT                                                            | Mixed method      |                     | Study framing, study design                                                         | Multiple level outer and inner context     | System, organizational, supervisors, provider | N                   | Y                   | N                        | N                      | Y                  | Y                           | Fidelity                                           | 0           | 0           | 2              | 1           | 3                                       |
|         | Aarons GA, Sommerfeld DH.[2]                  | 2012 | Examine the influence of leadership and leader member exchange on implementation climate and staff attitudes towards EBPs during a statewide implementation of SafeCare.                                                                                        | USA     | 30 teams providing home-based services to families in a statewide child-welfare system in one US state                         | Child welfare                                                                   | SafeCare <sup>a</sup>           | N                           | Cross-sectional survey                                                                     | Quantitative      |                     | Study design, measurement, analysis, reporting                                      | Single level inner context                 | Organizational                                | N                   | Y                   | N                        | N                      | N                  | N                           | N                                                  | 0           | 0           | 2              | 0           | 2                                       |
|         | Green AE, Cafri G, Aarons G.[3]               | 2016 | Examine the impact of a statewide implementation of an EBI (SafeCare) on key provider characteristics, including job autonomy and work attitudes.                                                                                                               | USA     | Statewide network of private nonprofit community based mental health and social service provider organizations in one US state | Child welfare                                                                   | SafeCare <sup>a</sup>           | N                           | 2 x 2 hybrid implementation trial                                                          | Quantitative      |                     | Study framing, measurement, interpretation of findings                              | Single level inner context                 | Organizational, provider                      | N                   | Y                   | N                        | N                      | Y                  | Y                           | N                                                  | 0           | 0           | 2              | 0           | 3                                       |
| 2       | Aarons GA, Green AE, Palinkas LA et al.[4]    | 2012 | Protocol to compare the effectiveness of two implementation strategies (traditional versus dynamic adaptation process) for the implementation of Safe Care, a behavioral and psychosocial EBP developed to prevent child neglect.                               | USA     | Child-welfare and home-visitation county services in multiple counties in one US state                                         | Child welfare                                                                   | SafeCare <sup>a</sup>           | N                           | Prospective Sequential Design (Hybrid Type 3 Implementation Design)                        | Mixed method      |                     | Study framing, study design, data collection, measurement, analysis, reporting      | Multiple level outer and inner context     | System, organization, provider, client        | Y                   | Y                   | N                        | N                      | Y                  | Y                           | Fidelity, feasibility, acceptability, utility      | 2           | 2           | 2              | 2           | 5                                       |
| 3       |                                               |      | To examine factors impacting the sustainment of an EBI across several public service sectors following multi-state, state-wide hybrid-design implementation trial                                                                                               | USA     | Home-based services in 11 systems in 87 counties across 2 US states                                                            | Child welfare                                                                   | SafeCare <sup>a</sup>           | N                           | Prospective and retrospective, observational mixed methods study using surveys, interviews | Mixed Method      |                     | Study framing; study design, data collection; measurement; data analysis; reporting | Multilevel across outer and inner contexts | System, organization and provider             | Y                   | Y                   | Y                        | Y                      | Y                  | N                           | Fidelity, adoption, reach/penetration, maintenance | 0           | 0           | 2              | 2           | 5                                       |
|         | Aarons GA, Green AE, Willging CE et al.[5]    | 2014 | Mixed-method study of a conceptual model of evidence-based intervention sustainment across multiple public-sector service settings                                                                                                                              | USA     | 11 service systems in 87 counties                                                                                              | Multiple public service sectors (mental health, public health, social services) | SafeCare <sup>a</sup>           | N                           | Retrospective and Prospective                                                              | Mixed method      |                     | Study framing; study design, data collection; measurement; data analysis; reporting | Multilevel across outer and inner contexts | System, organization and provider             | Y                   | Y                   | N                        | Y                      | Y                  | N                           | Fidelity, adoption, reach/penetration, maintenance | 0           | 0           | 1              | 2           | 5                                       |
|         | Willging CE, Green AE, Gunderson L et al.[6]  | 2015 | Study how policymakers at the system level pave the path for EBP implementation and influence ongoing utilization within public sector services.                                                                                                                | USA     | Social Work and Child Welfare Agencies                                                                                         | Child welfare                                                                   | SafeCare <sup>a</sup>           | N                           | Semi-structured interviews                                                                 | Qualitative       |                     | Study design, data collection, coding, reporting                                    | Single level outer context                 | System                                        | Y                   | N                   | Y                        | Y                      | N/A                | N                           | N                                                  | 0           | 0           | 2              | 2           | 4                                       |

| Project | Authors                                      | Year | Objective                                                                                                                                                                                                         | Country | Setting                                                                                             | Sector        | EBP, Innovation or Intervention             | Health focus reported (y/n) | Study design                                                                             | Study methodology | Larger Study Design | Type of EPIS use                                                      | Level of data collection                   | Level of analysis                                        | Outer context (y/n) | Inner context (y/n) | Innovation factors (y/n) | Bridging factors (y/n) | Imp Strategy (y/n) | Imp Strategy Reported (y/n) | Implement. Outcomes                     | Exploration | Preparation | Implementati | Sustainment | Depth (1: conceptual to 5: operational) |
|---------|----------------------------------------------|------|-------------------------------------------------------------------------------------------------------------------------------------------------------------------------------------------------------------------|---------|-----------------------------------------------------------------------------------------------------|---------------|---------------------------------------------|-----------------------------|------------------------------------------------------------------------------------------|-------------------|---------------------|-----------------------------------------------------------------------|--------------------------------------------|----------------------------------------------------------|---------------------|---------------------|--------------------------|------------------------|--------------------|-----------------------------|-----------------------------------------|-------------|-------------|--------------|-------------|-----------------------------------------|
|         |                                              |      |                                                                                                                                                                                                                   |         |                                                                                                     |               |                                             |                             |                                                                                          |                   |                     |                                                                       |                                            |                                                          |                     |                     |                          |                        |                    |                             |                                         |             |             |              |             |                                         |
|         | Aarons GA, Green AE, Trott E et al.[7]       | 2016 | Examine how outer and inner context leadership were related to system-wide EBI sustainment.                                                                                                                       | USA     | Home-based services in 11 systems in 87 counties across 2 US states                                 | Child welfare | SafeCare <sup>a</sup>                       | N                           | Prospective, longitudinal, observational, mixed methods using surveys and interviews     | Mixed method      |                     | Study framing; data collection; measurement; data analysis; reporting | Multilevel across outer and inner contexts | System and team                                          | Y                   | Y                   | N                        | N                      | Y                  | N                           | Fidelity                                | 0           | 0           | 1            | 2           | 4                                       |
|         | Willging CE, Aarons GA, Trott EM et al.[8]   | 2016 | Examine implementation of the Best Value-Performance Information Procurement System to contract for EBIs in a child welfare system, including the impact of key contextual factors.                               | USA     | Home visits                                                                                         | Child welfare | SafeCare <sup>a</sup>                       | N                           | Iterative Case Studies using semi-structured interviews                                  | Qualitative       |                     | Study design, data collection, coding, and reporting                  | Multilevel outer context                   | System                                                   | Y                   | Y                   | Y                        | Y                      | N/A                | N                           | N                                       | 0           | 0           | 2            | 2           | 4                                       |
| 4       |                                              |      | Examine the role of collaboration in a large-scale countywide implementation of an EBP.                                                                                                                           | USA     | Community-based organizations delivering home-based services                                        | Child welfare | SafeCare <sup>a</sup>                       | N                           | Longitudinal study                                                                       | Mixed method      |                     | Study framing, study design, coding, reporting                        | Multilevel outer and inner context         | System, organization, provider                           | Y                   | Y                   | Y                        | Y                      | Y                  | Y                           | Fidelity; acceptability; sustainability | 2           | 2           | 2            | 2           | 4                                       |
|         | Aarons GA, Fettes DL, Hurlburt MS et al.[9]  | 2014 | Examine the role of collaboration in a large-scale countywide implementation of an EBP.                                                                                                                           | USA     | Community-based organizations delivering home services in one County in one US state                | Child welfare | SafeCare <sup>a</sup>                       | N                           | Descriptive, semi-structured interviews and/or focus groups                              | Qualitative       |                     | Study framing, study design, coding, reporting                        | Multilevel outer and inner context         | System, organization, provider                           | Y                   | Y                   | Y                        | Y                      | Y                  | Y                           | N                                       | 1           | 1           | 2            | 0           | 4                                       |
|         | Chaffin M, Hecht D, Aarons G et al.[10]      | 2016 | Test whether an interdisciplinary collaborative team strategy transmits fidelity to subsequent provider cohorts and examine the impact of a culturally adapted version on cultural competency and fidelity.       | USA     | Community-based organizations delivering home-based services                                        | Child welfare | SafeCare <sup>a</sup>                       | N                           | prospective implementation study using growth modelling to compare fidelity trajectories | Quantitative      |                     | Study framing                                                         | Single level inner context                 | Provider                                                 | Y                   | Y                   | Y                        | Y                      | Y                  | Y                           | Fidelity                                | 0           | 2           | 2            | 1           | 3                                       |
|         | Hurlburt M, Aarons GA, Fettes D et al.[11]   | 2014 | Describe an implementation strategy (ICT model) and present preliminary results of its challenges across a service system implementing SafeCare.                                                                  | USA     | Community-based organizations delivering home-based services                                        | Child welfare | SafeCare <sup>a</sup>                       | N                           | Observational – in-depth interviews                                                      | Qualitative       |                     | Study framing, study design, reporting                                | Multilevel across outer and inner contexts | System, organization, supervisor, team, provider, client | Y                   | Y                   | Y                        | Y                      | Y                  | Y                           | N                                       | 2           | 2           | 2            | 2           | 4                                       |
|         | Willging CE, Trott EM, Fettes D et al.[12]   | 2017 | Examine the impact of outer and inner context factors, namely funding, fidelity requirements, provider demand and time, impacted the implementation and sustainment of SafeCare.                                  | USA     | Home visits/Child Welfare (multiple Child Welfare agencies across one large county in one US state) | Child welfare | SafeCare <sup>a</sup>                       | N                           | prospective, qualitative design                                                          | Qualitative       |                     | Study framing; coding; reporting                                      | Multilevel inner context                   | Organization, provider                                   | Y                   | Y                   | Y                        | Y                      | Y                  | Y                           | Fidelity; acceptability; sustainability | 0           | 0           | 2            | 2           | 4                                       |
| 5       | Aarons GA, Ehrhart MG, Moullin JC et al.[13] | 2017 | Protocol to test the effects of leadership and organizational change for implementation (LOCI) in facilitating motivational interviewing (MI) implementation in substance use disorder treatment (SUDT) settings. | USA     | Substance use disorder treatment programs across one US state                                       | Substance use | Motivational interviewing (MI) <sup>b</sup> | N                           | multiple cohort, cluster randomized trial                                                | Quantitative      |                     | Study design, measurement, analysis                                   | Multilevel inner context                   | Workgroup/ Team                                          | N                   | Y                   | N                        | N                      | Y                  | Y                           | Y                                       | 0           | 2           | 2            | 0           | 4                                       |
| 6       | Ault-Brutus A, Lee C, Singer S et al.[14]    | 2014 | Examine factors important for delivering a patient activation/self-management intervention.                                                                                                                       | USA     | 13 mental health clinics across six US states and territories                                       | Mental health | DECIDE <sup>c</sup>                         | N                           | process evaluation - interviews                                                          | Qualitative       | Hybrid trial        | Study design, data collection, coding, reporting                      | Single level inner context                 | Provider                                                 | N                   | Y                   | N                        | N                      | Y                  | N                           | N                                       | 0           | 0           | 2            | 0           | 3                                       |

| Project | Authors                                    | Year | Objective                                                                                                                                                                                                                                            | Country | Setting                                                                                    | Sector            | EBP, Innovation or Intervention                                                                                                                    | Health focus reported (y/n) | Study design                                                                                                                                      | Study methodology | Larger Study Design | Type of EPIS use                                                                       | Level of data collection                  | Level of analysis                    | Outer context (y/n) | Inner context (y/n) | Innovation factors (y/n) | Bridging factors (y/n) | Imp Strategy (y/n) | Imp Reported (y/n) | Implement. Outcomes                    | Exploration | Preparation | Implementati | Sustainment | Depth (1: conceptual to 5: operational) |
|---------|--------------------------------------------|------|------------------------------------------------------------------------------------------------------------------------------------------------------------------------------------------------------------------------------------------------------|---------|--------------------------------------------------------------------------------------------|-------------------|----------------------------------------------------------------------------------------------------------------------------------------------------|-----------------------------|---------------------------------------------------------------------------------------------------------------------------------------------------|-------------------|---------------------|----------------------------------------------------------------------------------------|-------------------------------------------|--------------------------------------|---------------------|---------------------|--------------------------|------------------------|--------------------|--------------------|----------------------------------------|-------------|-------------|--------------|-------------|-----------------------------------------|
|         |                                            |      |                                                                                                                                                                                                                                                      |         |                                                                                            |                   |                                                                                                                                                    |                             |                                                                                                                                                   |                   |                     |                                                                                        |                                           |                                      |                     |                     |                          |                        |                    |                    |                                        |             |             |              |             |                                         |
| 7       |                                            |      | Study the impact of a policy from the Department of Behavioral Health encouraging and incentivizing providers to implement evidence-based treatments to treat youth with mental health problems, with moderating impact of key contextual factors.   | USA     | Large urban public mental health system in one large US city                               | Mental health     | EBPs for mental health (e.g. cognitive behavioral therapy)                                                                                         | Y                           | prospective, sequential design with multiple observations, surveys and a hybrid-design case-study                                                 | Mixed method      |                     | Study framing, study design, data collection, measurement, analysis, coding, reporting | Multilevel inner context                  | Organizational, supervisor, provider | Y                   | Y                   | Y                        | Y                      | Y                  | Y                  | Adoption, reach/ penetration, fidelity | 1           | 2           | 2            | 1           | 4                                       |
|         | Beidas RS, Aarons G, Borg F et al.[15]     | 2013 | Policy to implementation: Evidence-based practice in community mental health - study protocol                                                                                                                                                        | USA     | 30 community mental health clinics in one large US city                                    | Mental health     | EBPs for youth and adults with mental health difficulties                                                                                          | N                           | prospective, sequential design with multiple observations                                                                                         | Mixed method      |                     | Study framing, study design, data collection, measurement, analysis, coding, reporting | Multilevel inner context                  | Organizational, supervisor, provider | Y                   | Y                   | N                        | Y                      | Y                  | N                  | Fidelity, adoption                     | 0           | 2           | 2            | 0           | 3                                       |
|         | Beidas RS, Stewart RE, Adams DR et al.[16] | 2016 | Examine stakeholder perspectives of implementation facilitators and barriers across contextual levels impacting the implementation and sustainment of EBPs following publicly mandated EBP initiative in a large, urban public mental health system. | USA     | Large urban public mental health system in one large US city                               | Mental health     | Evidence-based mental health interventions                                                                                                         | N                           | cross-sectional                                                                                                                                   | Qualitative       |                     | Study framing, data collection, coding, interpretation of findings                     | Multilevel outer and single inner context | All                                  | Y                   | Y                   | Y                        | Y                      | Y                  | Y                  | N                                      | 0           | 0           | 2            | 1           | 4                                       |
|         | Beidas RS, Adams DR, Kratz HE et al.[17]   | 2016 | Case study of efforts to implement a trauma-informed system in large publicly-funded behavioral health system, including key implementation strategies and outcomes.                                                                                 | USA     | Publicly Funded Behavioral Health System for Children and Adolescents in one large US city | Behavioral health | Trauma-Informed System; Trauma-Focused CBT <sup>d</sup>                                                                                            | Y                           | Hybrid design case study                                                                                                                          | Quantitative      |                     | Study design, measurement, analysis, reporting                                         | Single level inner context                | Provider, patient                    | Y                   | Y                   | N                        | N                      | Y                  | Y                  | Adoption, Implementation, Penetration  | 1           | 1           | 2            | 0           | 4                                       |
|         | Beidas RS, Edmunds J, Ditty M et al.[18]   | 2014 | Examine the association between adopter characteristics, individual perceptions of intra-organizational variables, and implementation outcomes for community therapists who received training and consultation in an EBP for youth anxiety.          | USA     | Community-based mental health clinics in one large US city                                 | Mental health     | Cognitive Behavioral Therapy (CBT) <sup>e</sup> for anxiety                                                                                        | N                           | Randomized implementation trial to test two therapist training conditions (training as usual versus computer training versus augmented training). | Quantitative      |                     | Study framing                                                                          | Single level inner context                | Provider                             | N                   |                     | N                        | N                      | Y                  | Y                  | Fidelity, penetration                  | 0           | 0           | 2            | 0           | 3                                       |
|         | Beidas RS, Marcus S, Aarons GA et al.[19]  | 2015 | Examine the contribution of individual and organizational characteristics associated with therapist use of CBT, family therapy and psychodynamic therapy in a large-scale EBP implementation effort.                                                 | USA     | 19 agencies within large urban public mental health system in one large US city            | Mental health     | Cognitive Behavioral Therapy (CBT) <sup>e</sup> for youth psychiatric disorders; family therapy                                                    | N                           | cross-sectional                                                                                                                                   | Quantitative      |                     | Study framing                                                                          | Single level inner context                | Provider                             | N                   | Y                   | N                        | N                      | Y                  | Y                  | Penetration                            | 0           | 0           | 1            | 0           | 2                                       |
|         | Skriner LC, Wolk CB, Stewart RE et al.[20] | 2018 | Examine the impact of inner context factors, namely therapist and organization factors, on participation in Mental Health system policy mandate.                                                                                                     | USA     | 22 behavioral health organizations within service system in one large US city              | Mental health     | Various evidence based mental health practices (CBT <sup>e</sup> , PE, <sup>f</sup> DBTg <sup>g</sup> , TF-CBT <sup>h</sup> ) for adults and youth | N                           | Survey                                                                                                                                            | Quantitative      |                     | Study framing, study design, measurement, analysis, reporting                          | Multilevel inner context                  | Organization, provider               | N                   | Y                   | N                        | N                      | N                  | N                  | Y                                      | 0           | 1           | 2            | 0           | 3                                       |

| Project | Authors                                           | Year | Objective                                                                                                                                                                                      | Country | Setting                                                                                                                                                     | Sector        | EBP, Innovation or Intervention                                                                                                                                                                                                                                                                                     | Health focus reported (y/n) | Study design                           | Study methodology | Larger Study Design                                                                                                | Type of EPIS use            | Level of data collection           | Level of analysis              | Outer context (y/n) | Inner context (y/n) | Innovation factors (y/n) | Bridging factors (y/n) | Imp Strategy (y/n) | Imp Strategy Reported (y/n) | Implement. Outcomes                       | Exploration | Preparation | Implementati | Sustainment | Depth (1: conceptual to 5: operational) |
|---------|---------------------------------------------------|------|------------------------------------------------------------------------------------------------------------------------------------------------------------------------------------------------|---------|-------------------------------------------------------------------------------------------------------------------------------------------------------------|---------------|---------------------------------------------------------------------------------------------------------------------------------------------------------------------------------------------------------------------------------------------------------------------------------------------------------------------|-----------------------------|----------------------------------------|-------------------|--------------------------------------------------------------------------------------------------------------------|-----------------------------|------------------------------------|--------------------------------|---------------------|---------------------|--------------------------|------------------------|--------------------|-----------------------------|-------------------------------------------|-------------|-------------|--------------|-------------|-----------------------------------------|
|         |                                                   |      |                                                                                                                                                                                                |         |                                                                                                                                                             |               |                                                                                                                                                                                                                                                                                                                     |                             |                                        |                   |                                                                                                                    |                             |                                    |                                |                     |                     |                          |                        |                    |                             |                                           |             |             |              |             |                                         |
| 8       |                                                   |      | Examine the sustainment of six EBPs following fiscally mandated policy in the large public mental health services system of Los Angeles county.                                                | USA     | 100 youth mental health agencies within one large US county                                                                                                 | Mental Health | 6 EBPs [Child-Parent Psychotherapy (CPP) <sup>h</sup> ; Cognitive Behavioral Intervention for Trauma in School (CBITS); Managing and Adapting Practice (MAP); Seeking Safety <sup>k</sup> ; Trauma- Focused Cognitive Behavioral Therapy (TF-CBT) <sup>d</sup> ; Triple P Positive Parenting Program <sup>l</sup> ] | N                           | Prospective observational              | Mixed methods     |                                                                                                                    | Study framing, study design | Multilevel inner context           | Organization, provider         | Y                   | Y                   | Y                        | N                      | N                  | NA                          | Reach/ penetration, fidelity, maintenance | 0           | 0           | 0            | 2           | 3                                       |
|         | Brookman-Fraze L, Stadnick N, Roesch S et al.[21] | 2016 | Measuring Sustainment of Multiple Practices Fiscally Mandated in Children's Mental Health Services                                                                                             | USA     | Youth mental health system in one large US county                                                                                                           | Mental health | 6 EBPs [Child-Parent Psychotherapy (CPP) <sup>h</sup> ; Cognitive Behavioral Intervention for Trauma in School (CBITS); Managing and Adapting Practice (MAP); Seeking Safety <sup>k</sup> ; Trauma- Focused Cognitive Behavioral Therapy (TF-CBT) <sup>d</sup> ; Triple P Positive Parenting Program <sup>l</sup> ] | N                           | Prospective                            | Quantitative      | Larger Implementati on effort to examine the sustainment of EBIs following fiscally mandated policy regarding EBIs | Study framing               | Multilevel inner context           | Organization, provider         | N                   | Y                   | Y                        | N                      | N/A                | N                           | Reach/ penetration                        | 0           | 0           | 0            | 2           | 2                                       |
|         | Lau AS, Brookman-Fraze L.[22]                     | 2016 | To examine the sustainment of practices within a policy-driven, fiscally mandated, multiple EBP implementation effort in the large public mental health services system of Los Angeles county. | USA     | 100 agencies within mental health system in large US county                                                                                                 | Mental health | 6 EBPs [Child-Parent Psychotherapy (CPP) <sup>h</sup> ; Cognitive Behavioral Intervention for Trauma in School (CBITS); Managing and Adapting Practice (MAP); Seeking Safety <sup>k</sup> ; Trauma- Focused Cognitive Behavioral Therapy (TF-CBT) <sup>d</sup> ; Triple P Positive Parenting Program <sup>l</sup> ] | N                           | Observational - surveys and interviews | Mixed-Method      |                                                                                                                    | Study framing, study design | Multilevel inner context           | Organization, provider         | Y                   | Y                   | N                        | N                      | N                  | NA                          | Reach/ penetration, fidelity, maintenance | 0           | 0           | 0            | 2           | 4                                       |
| 9       | Chamberlain P.[23]                                | 2017 | Describe the interventions and their implementation and preliminary results of two case studies.                                                                                               | USA     | Two child welfare systems (one urban city private system to 5/35 agencies to 2000 children/year, other 4/12 rural regions in 24/95 counties: public system) | Child welfare | Keeping foster and kin parents supported and trained (KEEP) <sup>m</sup> and Parenting Through Change for Reunification (PTC-R) <sup>n</sup> and casework practice model (R3) <sup>o</sup>                                                                                                                          | N                           | Two case studies                       | Descriptive       | Other papers on outcomes Chamberlain et al. (2016) and by Wulczyn and Feldman (in press)                           | Study framing, reporting    | Multilevel inner and outer context | System, supervisors, providers | Y                   | Y                   | N                        | N                      | Y                  | Y                           | Fidelity, reach                           | 0           | 2           | 2            | 0           | 2                                       |

| Project | Authors                                    | Year | Objective                                                                                                                                                                                                                                                                                                                                                                                                                                                  | Country   | Setting                                                                                                           | Sector                                             | EBP, Innovation or Intervention                                  | Health focus reported (y/n) | Study design                             | Study methodology | Larger Study Design                                                                        | Type of EPIS use                                      | Level of data collection                   | Level of analysis       | Outer context (y/n) | Inner context (y/n) | Innovation factors (y/n) | Bridging factors (y/n) | Imp Strategy (y/n) | Imp Strategy Reported (y/n) | Implement. Outcomes                  | Exploration                              | Preparation | Implementation | Sustainment | Depth (1: conceptual to 5: operational) |                     |
|---------|--------------------------------------------|------|------------------------------------------------------------------------------------------------------------------------------------------------------------------------------------------------------------------------------------------------------------------------------------------------------------------------------------------------------------------------------------------------------------------------------------------------------------|-----------|-------------------------------------------------------------------------------------------------------------------|----------------------------------------------------|------------------------------------------------------------------|-----------------------------|------------------------------------------|-------------------|--------------------------------------------------------------------------------------------|-------------------------------------------------------|--------------------------------------------|-------------------------|---------------------|---------------------|--------------------------|------------------------|--------------------|-----------------------------|--------------------------------------|------------------------------------------|-------------|----------------|-------------|-----------------------------------------|---------------------|
|         |                                            |      |                                                                                                                                                                                                                                                                                                                                                                                                                                                            |           |                                                                                                                   |                                                    |                                                                  |                             |                                          |                   |                                                                                            |                                                       |                                            |                         |                     |                     |                          |                        |                    |                             |                                      |                                          |             |                |             |                                         | Outer context (y/n) |
| 10      | Collins-Camargo C, Garstka TA.[24]         | 2014 | Study whether implementation/use of evidence-informed practices was a function of organizational supervision and team goals that focuses on using data and outcome to inform workers on how well they are doing during the implementation of performance-based contracting and quality assurance systems within the context of a public/private partnership when out-of-home case management is provided by private contractors in three states in the US. | USA       | Private agencies providing out-of-home care case management and residential treatment services                    | Child welfare                                      | Evidence-informed practices for child welfare                    | N                           | Retrospective secondary data analysis    | Quantitative      | Y (see Collins-Camargo et al., 2007; Garstka, Collins-Camargo, Hall, Neal, & Ensign, 2012) | Study design, measurement, analysis                   | Single level inner context                 | Organizational          | N                   | Y                   | N                        | N                      | N                  | N                           | N                                    | Use of evidence-informed practices (EIP) | 0           | 0              | 2           | 0                                       | 3                   |
| 11      | Deane FP, Andresen R, Crowe TP et al.[25]  | 2014 | Compare the effects of two different coaching approaches on the implementation and sustainment of a model of recovery-oriented service provision.                                                                                                                                                                                                                                                                                                          | Australia | Four community-managed mental health organizations/clinics, representing 13 sites across four states of Australia | Mental Health                                      | Collaborative Recovery Model <sup>p</sup> with ongoing coaching  | N                           | prospective quasi-experimental           | Quantitative      |                                                                                            | Study framing                                         | Single level inner context                 | Provider                | N                   | Y                   | N                        | N                      | Y                  | Y                           | Y                                    |                                          | 0           | 0              | 2           | 2                                       | 2                   |
| 12      | de Melo MNT, de Sá RMPF and Filho DAM.[26] | 2016 | Analyze the positive and negative factors related to the sustainability of the innovation to understand the processes related to the continuity of the innovative actions implemented.                                                                                                                                                                                                                                                                     | Brazil    | Schools in one Brazilian city                                                                                     | Public Health (Health promotion)                   | Brazilian School Food Program (PNAE) <sup>q</sup>                | N                           | Case study                               | Qualitative       |                                                                                            | Study framing, analysis                               | Multilevel across outer and inner contexts | System and organization | Y                   | Y                   | N                        | Y                      | N                  | N                           | N                                    |                                          | 0           | 0              | 1           | 2                                       | 1                   |
| 13      | Drabble L, Lemon K, D'Andrade A et al.[27] | 2013 | Examine the process of establishing, implementing and sustaining a community-academic partnership between Child Welfare and University, including key factors impacting this process.                                                                                                                                                                                                                                                                      | USA       | School of Social Work and Child Welfare Agencies                                                                  | Child welfare                                      | Child Welfare Partnership for Research and Training <sup>f</sup> | N                           | Descriptive case study                   | Qualitative       |                                                                                            | Study design and reporting                            | Multilevel inner and outer context         | System, organization    | Y                   | Y                   | N                        | Y                      | Y                  | Y                           | N                                    |                                          | 2           | 2              | 2           | 2                                       | 3                   |
| 14      | Drahota A, Aarons GA, Stahmer AC.[28]      | 2012 | Study protocol describing the development and pilot testing of a model of implementation to support the implementation of EBIs by Autism community providers.                                                                                                                                                                                                                                                                                              | USA       | Community-based behavioral health agencies serving youth with autism spectrum disorder                            | Behavioral health                                  | EBPs generally                                                   | N                           | Developmental and pilot test             | Mixed method      |                                                                                            | Study design, data collection, measurement, reporting | Multilevel inner context                   | Organization, provider  | N                   | Y                   | Y                        | Y                      | Y                  | Y                           | Feasibility, acceptability, fidelity | 2                                        | 2           | 2              | 0           | 2                                       |                     |
| 15      | Edmunds JM, Read KL, Ringle VA et al.[29]  | 2014 | Examine sustainment of clinicians providing an EBP two years following receiving training and consultation in the EBP.                                                                                                                                                                                                                                                                                                                                     | USA       | Mental health clinics                                                                                             | Mental Health                                      | Cognitive Behavioral Therapy (CBT) <sup>e</sup>                  | N                           | Two year follow-up survey and interviews | Mixed method      | Randomized trial to examine three training conditions                                      | Study framing, measurement, reporting                 | Single level inner context                 | Provider                | N                   | Y                   | N                        | N                      | Y                  | Y                           | Penetration, Sustainment (Fidelity)  | 0                                        | 0           | 0              | 2           | 2                                       |                     |
| 16      |                                            |      | Examine use of research evidence among leaders of county mental health, juvenile justice and child welfare systems participating in an RCT to scale up EBP implementation.                                                                                                                                                                                                                                                                                 | USA       | Children's services in 51 counties across two US states                                                           | Juvenile justice, mental health, child welfare     | Multidimensional Foster Care (MTFC) <sup>s</sup>                 | N                           | Cross-sectional                          | Mixed methods     | Stepped wedge RCT                                                                          | Study framing, measurement, reporting                 | Multilevel outer and inner context         |                         | Y                   | Y                   | Y                        | Y                      | Y                  | N                           | Y                                    |                                          | 1           | 1              | 2           | 0                                       | 4                   |
|         | Garcia AR, Kim M, Palinkas LA et al.[30]   | 2016 | Socio-contextual Determinants of Research Evidence Use in Public-Youth Systems of Care                                                                                                                                                                                                                                                                                                                                                                     | USA       | 3 service settings in 37 counties across one US state                                                             | Child welfare, juvenile justice, and mental health | Multidimensional Foster Care (MTFC) <sup>s</sup>                 | N                           | Retrospective cross-sectional            | Quantitative      |                                                                                            | Study framing, reporting                              | Single level outer context                 | System                  | Y                   | Y                   | N                        | N                      | Y                  | N                           | Y                                    |                                          | 1           | 1              | 1           | 0                                       | 2                   |
|         | Palinkas L, Wu Q, Fuentes D et al.[31]     | 2015 | Examine use of research evidence among leaders of county mental health, juvenile justice and child welfare systems participating in an RCT to scale up EBP implementation for youth in foster care.                                                                                                                                                                                                                                                        | USA       | Children's services in 51 counties across two US states                                                           | Juvenile justice, mental health, child welfare     |                                                                  | N                           | Cross-sectional                          | Mixed method      |                                                                                            | Study framing, measurement                            | Multilevel outer and inner context         | Organization            | Y                   | Y                   | Y                        | Y                      | Y                  | N                           | Y                                    |                                          | 0           | 1              | 2           | 0                                       | 4                   |

| Project | Authors                                                  | Year | Objective                                                                                                                                                                                                                                                                                                | Country | Setting                                                                                                    | Sector                                         | EBP, Innovation or Intervention                                                               | Health focus reported (y/n) | Study design                                                   | Study methodology | Larger Study Design                                     | Type of EPIS use                                                  | Level of data collection               | Level of analysis                      | Outer context (y/n) | Inner context (y/n) | Innovation factors (y/n) | Bridging factors (y/n) | Imp Strategy (y/n) | Imp Strategy Reported (y/n) | Implement. Outcomes                             | Exploration | Preparation | Implementation | Sustainment | Depth (1: conceptual to 5: operational) |
|---------|----------------------------------------------------------|------|----------------------------------------------------------------------------------------------------------------------------------------------------------------------------------------------------------------------------------------------------------------------------------------------------------|---------|------------------------------------------------------------------------------------------------------------|------------------------------------------------|-----------------------------------------------------------------------------------------------|-----------------------------|----------------------------------------------------------------|-------------------|---------------------------------------------------------|-------------------------------------------------------------------|----------------------------------------|----------------------------------------|---------------------|---------------------|--------------------------|------------------------|--------------------|-----------------------------|-------------------------------------------------|-------------|-------------|----------------|-------------|-----------------------------------------|
|         |                                                          |      |                                                                                                                                                                                                                                                                                                          |         |                                                                                                            |                                                |                                                                                               |                             |                                                                |                   |                                                         |                                                                   |                                        |                                        |                     |                     |                          |                        |                    |                             |                                                 |             |             |                |             |                                         |
| 17      | Gadomski AM, Wissow LS, Palinkas L et al.[32]            | 2014 | Provide insight into how to most effectively implement an implementation strategy for integrating MH and primary care, and how contextual factors influence sustainability.                                                                                                                              | USA     | Primary care practices                                                                                     | Mental health                                  | Primary Care Provider and Mental Health integration                                           | N                           | cross-sectional using semi-structured interviews               | Qualitative       | Larger TEACH study                                      | Study design, data collection, coding                             | Single level inner context             | Provider                               | Y                   | Y                   | N                        | Y                      | Y                  | N                           | N                                               | 0           | 0           | 1              | 0           | 2                                       |
| 18      | Gates LB, Hughes A, Kim DH.[33]                          | 2015 | Examine the impact of provider characteristics on the readiness to adopt a career development and employment intervention.                                                                                                                                                                               | USA     | Foster care through community NFPs and public child welfare agency                                         | Child welfare                                  | Career Development and Employment best practices                                              | N                           | Retrospective survey                                           | Quantitative      |                                                         | Study design, measurement                                         | Multilevel inner context               | Supervisor, provider                   | N                   | Y                   | N                        | N                      | N/A                | N                           | N                                               | 2           | 2           | 0              | 0           | 3                                       |
| 19      | Gleacher AA, Olin SS, Nadeem E et al.[34]                | 2016 | Examine the factors and elucidate the interplay between barriers and facilitators that influenced the adoption and implementation of a technologically sophisticated measurement feedback system.                                                                                                        | USA     | Two community based mental health clinics                                                                  | Mental health                                  | Contextualized Feedback System (CFS) <sup>t</sup>                                             | N                           | Semi-structured interviews                                     | Mixed method      | Quantitative uptake and impact study on client outcomes | Study framing, design, data collection, coding                    | Single level inner context             | System, organization, provider, client | N                   | Y                   | Y                        | Y                      | Y                  | N                           | Adoption and implementation                     | 0           | 2           | 2              | 0           | 4                                       |
| 20      | Goldstein H, Olszewski A.[35]                            | 2015 | Describe the process of parallel intervention development with an implementation focus using data based decision making of early literacy curriculum for preschoolers.                                                                                                                                   | USA     | Across early childhood education settings                                                                  | Education                                      | Supplemental early literacy curriculum                                                        | Y                           | Retrospective hybrid effectiveness/ implementation cluster RCT | Mixed method      | Results paper, Greenwood et al. 2014                    | Reporting, interpretation                                         | Multiple level outer and inner context | System, organizational, provider       | Y                   | Y                   | Y                        | Y                      | Y                  | N                           | Feasibility, stages of implementation, fidelity | 2           | 2           | 2              | 1           | 3                                       |
| 21      | Green AE, Aarons GA.[36]                                 | 2011 | Assess potential differences between administrators/ policymakers and those involved in direct practice regarding factors believed to be barriers or facilitating factors to EBP implementation.                                                                                                         | USA     | Community child and adolescent mental health services in one county in 1 US state                          | Mental health (child & adolescent)             | EBP generally                                                                                 | N                           | Concept mapping, descriptive, cross-sectional                  | Mixed method      |                                                         | Reporting                                                         | Multilevel outer and inner context     | All                                    | Y                   | Y                   | Y                        | N                      | N/A                | N                           | N                                               | 0           | 0           | 2              | 0           | 3                                       |
| 22      | Guerrero EG, He A, Kim A et al.[37]                      | 2014 | Evaluate organizational factors associated with the implementation of contingency management treatment (CMT) and medication-assisted treatment (MAT) in substance abuse treatment (SAT) programs serving racial and ethnic minority communities.                                                         | USA     | 122 publicly-funded addiction health services programs in Public Health system in large US city            | Substance Use (Public Health)                  | Contingency Management Treatment <sup>u</sup> and Medication-Assistant Treatment <sup>v</sup> | N                           | cross-sectional                                                | Quantitative      |                                                         | Study framing, study design, data collection, analysis, reporting | Single level inner context             | Organization, supervisor               | Y                   | Y                   | N                        | N                      | N                  | N                           | Implementation                                  | 0           | 0           | 2              | 0           | 3                                       |
| 23      | Guerrero EG, Andrews C, Harris L et al.[38]              | 2016 | Evaluated the extent to which environmental and organizational characteristics influenced the likelihood of high coordination of mental health and public health services in addiction health services (AHS) in low-income racial and ethnic minority communities in Los Angeles, between 2011 and 2013. | USA     | 147 AHS outpatient programs serving low-income racial and ethnic minority communities in one large US city | Behavioral Health, Public Health, Primary Care | No intervention, rather coordinated mental health and public health services                  | N                           | Longitudinal study (two times points)                          | Mixed methods     |                                                         | Study framing, study design, measurement, analysis, reporting     | Multilevel inner context               | Organization, provider                 | Y                   | Y                   | Y                        | N                      | N                  | NA                          | N                                               | 0           | 0           | 1              | 0           | 3                                       |
| 24      | Horwitz SM, Hurlburt MS, Goldhaber-Fiebert JD et al.[39] | 2014 | Examine use of existing resources as well as barriers and facilitators to exploration, adoption, and implementation of new EBPs in Child Welfare Agencies.                                                                                                                                               | USA     | Child welfare agencies                                                                                     | Child welfare                                  | EBPs generally                                                                                | N                           | Semi-structured interviews                                     | Mixed method      |                                                         | Study design, data collection, interpretation                     | Single level inner context             | Organization                           | N                   | N                   | N                        | N                      | N/A                | N                           | Use                                             | 2           | 2           | 2              | 1           | 2                                       |
| 25      | Humphrey A, Eastwood L, Atkins H, et al.[40]             | 2016 | To describe commissioning and service structures enabling implementation of evidence-based cost-effective care as illustrated by the "1419" young people's service treating mild to moderate severity mental health difficulties in teenagers old 14 to 19 years.                                        | UK      | Mental Health                                                                                              | Mental health (child and adolescent)           | Collaborative commissioning <sup>w</sup>                                                      | N                           | Cross-sectional observational hybrid design case study         | Mixed method      |                                                         | Reporting                                                         | Single level inner context             | Organizational, patient                | Y                   | Y                   | Y                        | N                      | Y                  | Y                           | N                                               | 2           | 2           | 2              | 2           | 3                                       |

| Project | Authors                                                | Year | Objective                                                                                                                                                                                                                                                                                                                                         | Country | Setting                                                                                                                | Sector                               | EBP, Innovation or Intervention                                              | Health focus reported (y/n) | Study design                                                                        | Study methodology | Larger Study Design                | Type of EPIS use                                                | Level of data collection             | Level of analysis      | Outer context (y/n) | Inner context (y/n) | Innovation factors (y/n) | Bridging factors (y/n) | Imp Strategy (y/n) | Imp Strategy Reported (y/n) | Implement. Outcomes                     | Exploration | Preparation | Implementation | Sustainment | Depth (1: conceptual to 5: operational) |
|---------|--------------------------------------------------------|------|---------------------------------------------------------------------------------------------------------------------------------------------------------------------------------------------------------------------------------------------------------------------------------------------------------------------------------------------------|---------|------------------------------------------------------------------------------------------------------------------------|--------------------------------------|------------------------------------------------------------------------------|-----------------------------|-------------------------------------------------------------------------------------|-------------------|------------------------------------|-----------------------------------------------------------------|--------------------------------------|------------------------|---------------------|---------------------|--------------------------|------------------------|--------------------|-----------------------------|-----------------------------------------|-------------|-------------|----------------|-------------|-----------------------------------------|
|         |                                                        |      |                                                                                                                                                                                                                                                                                                                                                   |         |                                                                                                                        |                                      |                                                                              |                             |                                                                                     |                   |                                    |                                                                 |                                      |                        |                     |                     |                          |                        |                    |                             |                                         |             |             |                |             |                                         |
| 26      | Hunter SB, Han B, Slaughter ME <i>et al.</i> [41]      | 2015 | Examine factors associated with sustainment of the adolescent community reinforcement approach, an EBP, to address adolescent substance use.                                                                                                                                                                                                      | USA     | Community-based treatment organizations                                                                                | Behavioral health                    | Adolescent community reinforcement approach <sup>x</sup>                     | N                           | Prospective - Interviews and surveys analyzed using discrete-time survival analysis | Mixed method      |                                    | Study design, data collection, measurement                      | Multiple level inner context         | Organization           | Y                   | Y                   | Y                        | N                      | N/A                | N                           | Sustainment (use, fidelity)             | 0           | 0           | 2              | 2           | 1                                       |
| 27      | Kothari BH, McBeath B, Lamson-Siu E <i>et al.</i> [42] | 2014 | Present the development, delivery, cost, and feasibility of a novel sibling-focused intervention program.                                                                                                                                                                                                                                         | USA     | Foster care homes                                                                                                      | Child welfare                        | Supporting Siblings in Foster Care (SIBS-FC) <sup>y</sup>                    | N                           | Prospective                                                                         | Mixed-method      | Prospective trial                  | Study framing                                                   | Multilevel inner context             | Provider, client       | N                   | N                   | N                        | Y                      | N/A                | Y                           | Cost, fidelity                          | 0           | 1           | 2              | 0           | 1                                       |
| 28      | Kotte A, Hill KA, Mah AC <i>et al.</i> [43]            | 2016 | Examine the implementation facilitators and barriers of a state-wide roll-out of a measurement feedback system (MFS) in a youth public mental health system.                                                                                                                                                                                      | USA     | State-wide child and adolescent mental health department                                                               | Mental health                        | Measurement feedback systems (MFS) <sup>z</sup> for Ohio scale               | N                           | Formative case study using semi-structured interviews                               | Qualitative       |                                    | Study framing, reporting                                        | Single level inner context           | Organization, provider | Y                   | Y                   | Y                        | Y                      | N/A                | N                           | N                                       | 1           | 1           | 2              | 1           | 4                                       |
| 29      | Knight DK, Belenko S, Wiley T <i>et al.</i> [44]       | 2016 | Study protocol describing large-scale hybrid implementation trial examining effectiveness of implementation strategies at promoting EBP use in Juvenile Justice and Behavioral Health Agencies across stages of implementation.                                                                                                                   | USA     | Juvenile Justice and Behavioral Health Agencies                                                                        | Juvenile Justice; Behavioral Health  | EBPs                                                                         | N                           | Hybrid design head-to-head cluster randomized trial with a phased rollout           | Mixed method      |                                    | Study design, data collection, measurement, analysis            | Multilevel outer and inner context   | Organization, patient  | Y                   | Y                   | Y                        | Y                      | Y                  | Y                           | Fidelity; acceptability; sustainability | 2           | 2           | 2              | 2           | 5                                       |
| 30      | Lambert D, Richards T, Merrill T. <i>[45]</i>          | 2016 | Examine contextual factors key across stages of implementation to Child Welfare implementation initiatives in three statewide efforts.                                                                                                                                                                                                            | USA     | Child welfare agencies across 3 US states                                                                              | Child welfare                        | EBPs generally                                                               | N                           | Case studies                                                                        | Qualitative       |                                    | Study framing, design, reporting                                | Multilevel inner context             | System                 | Y                   | Y                   | N                        | N                      | N/A                | N                           | N                                       | 0           | 0           | 0              | 0           | 2                                       |
| 31      | Leavy B, Kwak L, Hagströmer M <i>et al.</i> [46]       | 2017 | Study protocol to test effectiveness of the clinical intervention, conduct a process evaluation and collect barriers and facilitators of implementation.                                                                                                                                                                                          | Sweden  | 4-6 rehabilitation clinics ranging from primary care to outpatient clinics specializing in neurological rehabilitation | Rehabilitation                       | HiBalance <sup>aa</sup>                                                      | Yes (study protocol)        | Hybrid Type I, non-randomized control design                                        | Mixed method      | Protocol paper                     | Study design                                                    | Multiple level inner context         | Provider, Patient      | N                   | N                   | N                        | N                      | Y                  | Y                           | Fidelity, reach/penetration             | 2           | 2           | 2              | 0           | 2                                       |
| 32      | Nadeem E, Weiss D, Olin SS <i>et al.</i> [47]          | 2016 | Develop and pilot a brief, theory-based, manualized Learning Collaborative (LC) and determine whether community mental health clinics participating in the LC were more likely to implement a new practice being rolled-out in a statewide clinician training program compared to clinics participating in the state's training program as usual. | USA     | 12 child-serving clinics representing 10 community agencies in one large US city                                       | Mental health (child and adolescent) | Managing and Adapting Practice (MAP) <sup>i</sup>                            | N                           | Randomized implementation study                                                     | Quantitative      |                                    | Study framing, study design, reporting                          | Single level inner context           | Organization, provider | N                   | Y                   | N                        | N                      | Y                  | Y                           | Fidelity, adoption, reach/penetration   | 0           | 0           | 2              | 0           | 2                                       |
| 33      | Nadeem E, Ringle VA. <i>[48]</i>                       | 2016 | Investigate the factors influencing the ongoing use of an EBP in an urban school district.                                                                                                                                                                                                                                                        | USA     | 1 urban school district                                                                                                | Education                            | Cognitive Behavioral Intervention for Trauma in Schools (CBITS) <sup>j</sup> | N                           | Retrospective using semi-structured interviews                                      | Qualitative       | Evaluation of CBITS implementation | Reporting                                                       | Single level outer and inner context | System, organization   | Y                   | Y                   | N                        | N                      | Y                  | Y                           | Y                                       | 0           | 0           | 2              | 2           | 2                                       |
| 34      | Padwa H, Teruya C, Tran E <i>et al.</i> [49]           | 2016 | Examine the implementation (inner and outer context factors) of integrated care protocols in three primary care organizations.                                                                                                                                                                                                                    | USA     | Primary care clinics                                                                                                   | Primary care                         | Project Care <sup>bb</sup>                                                   | N                           | Prospective and retrospective                                                       | Mixed method      |                                    | Study design, data collection, measurement; analyses, reporting | Multilevel inner context             | Organization           | Y                   | Y                   | Y                        | Y                      | Y                  | Y                           | N                                       | 0           | 0           | 2              | 0           | 4                                       |

| Project | Authors                                         | Year | Objective                                                                                                                                                                                                                                                         | Country      | Setting                                                                                        | Sector        | EBP, Innovation or Intervention                                      | Health focus reported (y/n) | Study design                                | Study methodology | Larger Study Design                        | Type of EPIS use                                               | Level of data collection   | Level of analysis                                    | Outer context (y/n) | Inner context (y/n) | Innovation factors (y/n) | Bridging factors (y/n) | Imp Strategy (y/n) | Imp Strategy Reported (y/n) | Implement. Outcomes                        | Exploration | Preparation | Implementation | Sustainment | Depth (1: conceptual to 5: operational) |   |
|---------|-------------------------------------------------|------|-------------------------------------------------------------------------------------------------------------------------------------------------------------------------------------------------------------------------------------------------------------------|--------------|------------------------------------------------------------------------------------------------|---------------|----------------------------------------------------------------------|-----------------------------|---------------------------------------------|-------------------|--------------------------------------------|----------------------------------------------------------------|----------------------------|------------------------------------------------------|---------------------|---------------------|--------------------------|------------------------|--------------------|-----------------------------|--------------------------------------------|-------------|-------------|----------------|-------------|-----------------------------------------|---|
|         |                                                 |      |                                                                                                                                                                                                                                                                   |              |                                                                                                |               |                                                                      |                             |                                             |                   |                                            |                                                                |                            |                                                      |                     |                     |                          |                        |                    |                             |                                            |             |             |                |             |                                         |   |
| 35      | Palinkas LA, Fuentes D, Finno M et al.[50]      | 2014 | To examine the role of inter-organizational collaboration in implementing new evidence-based practices for addressing problem behaviors in at-risk youth.                                                                                                         | USA          | Probation, mental health, and child welfare departments in 12 counties in one US state         | Child Welfare | Multidimensional Treatment Foster Care (MTFC) <sup>a</sup>           | N                           | Cross-sectional study                       | Qualitative       | Stepped wedge, randomized controlled trial | Reporting                                                      | Single level outer context | System, organization                                 | Y                   | Y                   | N                        | Y                      | Y                  | Y                           | Y                                          | N           | 0           | 0              | 2           | 0                                       | 3 |
| 36      |                                                 |      | Examine the clinical effectiveness, implementation process and perceptions of requirements for sustainment of a train-the-trainer implementation model of a behavioral intervention to reduce sexually transmitted infections among female sex workers in Mexico. | Mexico       | Community-based reproductive health clinics across 12 Mexican cities                           | Public health | Mujer Segura (Healthy Woman) <sup>cc</sup>                           | Y                           | Hybrid Type 2                               | Mixed methods     |                                            | Analysis, coding, reporting                                    | Multilevel inner context   | Organization, intervention                           | Y                   | Y                   | Y                        | N                      | Y                  | Y                           | Fidelity                                   | 0           | 0           | 2              | 2           | 2                                       |   |
|         | Patterson TL, Semple SJ, Chavarin CV et al.[51] | 2012 | Implementation of an efficacious intervention for high risk women in Mexico: protocol for a multi-site randomized trial with a parallel study of organizational factors                                                                                           | Mexico       | Community-based organizations across 12 Mexican cities                                         | Public health | Mujer Segura (Healthy Woman) <sup>cc</sup>                           | Y                           | Hybrid, Type II                             | Mixed method      |                                            | Analysis and coding                                            | Multilevel inner context   | Organization, intervention                           | N                   | Y                   | N                        | N                      | Y                  | Y                           | Fidelity                                   | 0           | 0           | 2              | 0           | 2                                       |   |
|         | Palinkas LA, Chavarin CV, Rafful CM et al.[52]  | 2015 | Examine service provider perceptions of requirements for successful sustainment of an efficacious intervention for preventing HIV/AIDS and STIs in female sex workers.                                                                                            | Mexico       | Community-based reproductive health clinics                                                    | Public health | Mujer Segura (Healthy Woman) <sup>cc</sup>                           | N                           | Follow-up semi-structured interviews        | Qualitative       |                                            | Reporting                                                      | Multilevel inner context   | System, organization, provider, client, intervention | Y                   | Y                   | Y                        | N                      | Y                  | Y                           | N                                          | 0           | 0           | 2              | 2           | 2                                       |   |
| 37      | Peltzer K, Prado G, Horigian V et al.[53]       | 2016 | Explore organizational and provider factors associated with prevention of mother-to-child HIV transmission implementation in South Africa.                                                                                                                        | South Africa | Community Health Centers                                                                       | Public health | Prevention of mother-to-child HIV transmission (PMTCT) <sup>dd</sup> | N                           | Cross-sectional survey                      | Quantitative      | Effectiveness clinical trial               | Study framing                                                  | Multilevel inner context   | Organizational, provider                             | N                   | Y                   | N                        | N                      | N/A                | N                           | Acceptability, reach/penetration, fidelity | 0           | 0           | 2              | 0           | 1                                       |   |
| 38      |                                                 |      | Examine factors impacting implementation of EBPs by substance use treatment providers serving American Indians/Alaska Natives (AI/ANs).                                                                                                                           | USA          | Substance use disorder treatment programs serving American Indian/Alaskan Native communities   | Substance use | EBPs generally                                                       | N                           | Survey and case-study                       | Mixed method      |                                            | Study design; data collection, measurement, analysis reporting | Multilevel inner context   | Organization, provider                               | N                   | Y                   | N                        | N                      | N/A                | N                           | N                                          | 2           | 1           | 2              | 0           | 2                                       |   |
|         | Rieckmann T, Moore LA, Croy CD et al.[54]       | 2016 | A national study of American Indian and Alaska Native substance abuse treatment: provider and program characteristics                                                                                                                                             | USA          | Substance use disorder treatment centers                                                       | Substance use | EBPs generally                                                       | N                           | Survey                                      | Quantitative      |                                            | Study design, measurement, analysis, reporting                 | Multilevel inner context   | Organization, provider                               | N                   | Y                   | N                        | N                      | Y                  | N                           | N                                          | 0           | 0           | 1              | 0           | 2                                       |   |
|         | Moore LA, Aarons GA, Davis JH et al.[55]        | 2015 | Assess knowledge and attitudes towards EBPs among clinicians and clinical administrators working in treatment programs servicing American Indian/Alaskan Native communities.                                                                                      | USA          | Substance use disorder treatment programs servicing American Indian/Alaskan Native communities | Substance use | EBPs generally                                                       | N                           | Observational - interviews and focus groups | Qualitative       |                                            | Study design; data collection                                  | Multilevel inner context   | Provider                                             | N                   | Y                   | N                        | N                      | N/A                | N                           | N                                          | 2           | 1           | 0              | 0           | 2                                       |   |
|         | Dickerson D, Moore LA, Rieckmann T et al.[56]   | 2018 | Examine contextual factors impacting implementation of MI by substance use treatment providers serving American Indians/Alaska Natives (AI/ANs).                                                                                                                  | USA          | Substance use disorder treatment centers                                                       | Substance use | Motivational interviewing (MI) <sup>b</sup>                          | N                           | Retrospective survey                        | Quantitative      |                                            | Study design, data measurement, analysis                       | Multilevel inner context   | Organization, provider                               | N                   | Y                   | N                        | N                      | N/A                | N                           | Y                                          | 0           | 0           | 2              | 0           | 2                                       |   |



| Project | Authors                                            | Year | Objective                                                                                                                                                                                                                                                                                                                                     | Country      | Setting                                                                                             | Sector                             | EBP, Innovation or Intervention                                                                | Health focus reported (y/n) | Study design                                                        | Study methodology | Larger Study Design                                                                                                                | Type of EPIS use                                                            | Level of data collection           | Level of analysis                      | Outer context (y/n) | Inner context (y/n) | Innovation factors (y/n) | Bridging factors (y/n) | Imp Strategy (y/n) | Imp Strategy Reported (y/n)                                       | Implement. Outcomes | Exploration | Preparation | Implementation | Sustainment | Depth (1: conceptual to 5: operational) |
|---------|----------------------------------------------------|------|-----------------------------------------------------------------------------------------------------------------------------------------------------------------------------------------------------------------------------------------------------------------------------------------------------------------------------------------------|--------------|-----------------------------------------------------------------------------------------------------|------------------------------------|------------------------------------------------------------------------------------------------|-----------------------------|---------------------------------------------------------------------|-------------------|------------------------------------------------------------------------------------------------------------------------------------|-----------------------------------------------------------------------------|------------------------------------|----------------------------------------|---------------------|---------------------|--------------------------|------------------------|--------------------|-------------------------------------------------------------------|---------------------|-------------|-------------|----------------|-------------|-----------------------------------------|
|         |                                                    |      |                                                                                                                                                                                                                                                                                                                                               |              |                                                                                                     |                                    |                                                                                                |                             |                                                                     |                   |                                                                                                                                    |                                                                             |                                    |                                        |                     |                     |                          |                        |                    |                                                                   |                     |             |             |                |             |                                         |
| 39      | Rye M, Torres EM, Friborg O et al.[57]             | 2017 | Describe the adaptation of a shortened version of the EBPAS and examine the psychometric properties of the shortened version in two samples.                                                                                                                                                                                                  | USA & Norway | 65 US mental health programs, Norwegian Psychological Association and Norwegian Nurses Organization | Mental health, psychology, nursing | EBP generally                                                                                  | N                           | cross-sectional measurement study                                   | Quantitative      |                                                                                                                                    | Study framing                                                               | Single level inner context         | Provider                               | N                   | Y                   | N                        | N                      | N/A                | N                                                                 | EBP attitudes       | 0           | 0           | 0              | 0           | 1                                       |
| 40      | Stroobants T Vanderfaeilli J, Andries C et al.[58] | 2016 | Examine the association between EBP knowledge, attitudes towards EBP, adoption of EBP and provider background characteristics.                                                                                                                                                                                                                | Belgium      | 23 Home-visiting care organization in one Belgian city                                              | Public health (child welfare)      | EBP generally and empirically supported treatments (ESTs)                                      | N                           | cross-sectional, descriptive, survey                                | Quantitative      |                                                                                                                                    | Study framing, interpretation                                               | Single level inner context         | Provider                               | N                   | Y                   | N                        | N                      | N/A                | N                                                                 | Y                   | 0           | 1           | 0              | 0           | 1                                       |
| 41      | Walker SC, Whitener R, Trupin EW et al.[59]        | 2015 | To explore how EBPs were currently perceived by tribes in Washington State and what kinds of policies and strategies tribal communities would recommend, if any, for the potential expansion of EBP.                                                                                                                                          | USA          | 29 federally recognized and 7 non-federally recognized AI/AN tribes in one US State                 | Behavioral Health                  | Five EBPs                                                                                      | N                           | Cross-sectional study                                               | Qualitative       | Used findings from this study to inform next phase of planning an intervention to support implementation of EBPs in this community | Reporting                                                                   | Multilevel inner context           | System, community, individual, program | N                   | N                   | N                        | N                      | N                  | N                                                                 | N                   | 2           | 2           | 2              | 2           | 2                                       |
| 42      | Wang B, Stanton B, Deveaux L et al.[60]            | 2017 | This study examines factors influencing teachers' patterns of use of the intervention in the implementation phase and inner context attitudes and self-efficacy/comfort with the intervention. Implementation, the impact of teachers' initial implementation of FOYC, and subsequent delivery of the booster sessions on students' outcomes. | The Bahamas  | 114 government primary/ junior high schools in The Bahamas                                          | Public Health                      | FOYC <sup>ee</sup>                                                                             | Y                           | Prospective, longitudinal pre- and post-design survey               | Quantitative      |                                                                                                                                    | Study framing, study design, Measurement                                    | Multilevel inner context           | School, Teacher, student               | N                   | Y                   | N                        | N                      | N                  | NA                                                                | Fidelity            | 0           | 0           | 2              | 0           | 3                                       |
| 43      | Willing CE, Sommerfeld DH, Aarons GA et al.[61]    | 2014 | Examine the impact of a statewide behavioral health reform on safety-net institutions, including impact on provider attitudes and reactions.                                                                                                                                                                                                  | USA          | 14 Safety net institutions in a Behavioral Healthcare system in one US state                        | Behavioral health                  | ValueOptions New Mexico <sup>ff</sup>                                                          | N                           | Prospective Case Study                                              | Mixed method      | Prospective mixed-method study of behavioral health reform in New Mexico                                                           | Study design; sampling; data collection; reporting                          | Multilevel inner context           | Organization                           | Y                   | Y                   | N                        | N                      |                    | public-private partnership with a for-profit managed care company | N                   | 0           | 0           | 2              | 0           | 4                                       |
| 44      | Willing CE, Lamphere L, Rylko-Bauer B.[62]         | 2015 | Evaluate and describe three initiatives in New Mexico (comprehensive community support services (CCSS), clinical homes (CHs), and core service agencies (CSAs)) as part of state-wide efforts to support people with serious mental illness.                                                                                                  | USA          | Behavioral health agencies                                                                          | Mental health                      | Wraparound <sup>gg</sup>                                                                       | N                           | descriptive study, using document review and qualitative interviews | Qualitative       |                                                                                                                                    | Study framing, study design, data collection, coding                        | Multilevel inner and outer context | System, organizational                 | Y                   | Y                   | N                        | N                      | N                  | N                                                                 | N                   | 2           | 2           | 2              | 2           | 4                                       |
| 45      | Willing CE, Green AE, Ramos MM.[63]                | 2016 | Protocol of study aiming to test the 4-phases of implementation of a school nursing program to reduce LGBTQ Adolescent Suicide, including key cross-level implementation factors (student, provider, school, community) and youth outcomes.                                                                                                   | USA          | 40 Publicly funded high schools in one US state                                                     | School-based Nursing               | RLAS <sup>hh</sup> : Implementing School Nursing Strategies to Reduce LGBTQ Adolescent Suicide | Y (will be reported)        | cluster randomized controlled trial, hybrid type I design           | Mixed method      |                                                                                                                                    | Study framing, study design, data collection, measurement, analysis, coding | Multilevel outer and inner context | Organization, provider                 | Y                   | Y                   | N                        | N                      | Y                  | Y                                                                 | Fidelity            | 2           | 2           | 2              | 2           | 5                                       |

| Project | Authors                                            | Year | Objective                                                                                                                                                                                                                                                                                    | Country      | Setting                                                          | Sector        | EBP, Innovation or Intervention             | Health focus reported (y/n) | Study design                      | Study methodology | Larger Study Design                             | Type of EPIS use                      | Level of data collection     | Level of analysis                 | Outer context (y/n) | Inner context (y/n) | Innovation factors (y/n) | Bridging factors (y/n) | Imp Strategy (y/n) | Imp Strategy Reported (y/n) | Implement. Outcomes                      | Exploration | Preparation | Implementation | Sustainment | Depth (1: conceptual to 5: operational) |
|---------|----------------------------------------------------|------|----------------------------------------------------------------------------------------------------------------------------------------------------------------------------------------------------------------------------------------------------------------------------------------------|--------------|------------------------------------------------------------------|---------------|---------------------------------------------|-----------------------------|-----------------------------------|-------------------|-------------------------------------------------|---------------------------------------|------------------------------|-----------------------------------|---------------------|---------------------|--------------------------|------------------------|--------------------|-----------------------------|------------------------------------------|-------------|-------------|----------------|-------------|-----------------------------------------|
| 46      | Williams JR, Blais MP, Banks D et al.[64]          | 2014 | Examine the individual and organizational factors associated with adoption of motivational interviewing in community health organizations.                                                                                                                                                   | USA          | 92 Community Health Organizations/Centers across the US          | Public health | Motivational interviewing (MI) <sup>b</sup> | N                           | cross-sectional                   | Quantitative      | RCT                                             | Study framing, design, measurement    | Multilevel inner context     | Organization, supervisor provider | N                   | Y                   | N                        | N                      | N/A                | N                           | Adoption                                 | 1           | 0           | 0              | 0           | 2                                       |
| 47      | Stirman SW, Matza A, Gamarra J et al.[65]          | 2015 | Examine contextual factors key to supporting sustainment of an EBP (Cognitive Therapy) in large, urban mental health system.                                                                                                                                                                 | USA          | Mental Health Clinics                                            | Mental health | Cognitive Therapy <sup>ii</sup>             | Y                           | Cross-sectional                   | Qualitative       | Prospective observational                       | Study design, data collection, coding | Multilevel inner context     | System, organizational            | Y                   | N                   | Y                        | N                      | N                  | N                           | Fidelity                                 | 0           | 0           | 1              | 2           | 3                                       |
| 48      | Wiltsey Stirman S, Finley EP, Shields N et al.[66] | 2017 | Protocol of study aiming to compare two implementation strategies (fidelity-oriented learning collaborative versus continuous quality improvement-oriented learning collaborative) promoting the sustainment of an EBP for posttraumatic stress disorder in community mental health clinics. | USA & Canada | Mental health clinics                                            | Mental health | Cognitive Processing Therapy <sup>ii</sup>  | Y (will be reported)        | Type-III randomized hybrid design | Mixed method      | Type-III mixed-methods randomized hybrid design | Data collection; coding               | Multiple level inner context | Organization, Provider, Patient   | N                   | Y                   | N                        | N                      | Y                  | Y                           | Fidelity; penetration; adaptation; costs | 0           | 0           | 2              | 2           | 2                                       |
| 49      | Zimmerman L, Lounsbury DW, Rosen CS et al.[67]     | 2016 | Pilot test the Participatory Systems Dynamics Modeling (PSD) process, simulating implementation plans to improve EBP reach.                                                                                                                                                                  | USA          | 1 Veterans Health Administration outpatient mental health system | Mental health | EBPs generally                              | N                           | Case study                        | Mixed method      |                                                 | Study framing                         | Single level inner context   | System, organization, provider    | Y                   | Y                   | Y                        | Y                      | Y                  | Y                           | Adoption, reach                          | 0           | 0           | 2              | 0           | 2                                       |

**Note: EBP, Innovation or Intervention**

- a. Safe Care: a behavioral and psychosocial, manualized and highly structured EBP that uses classic behavioral intervention techniques delivered through home-based training and education of caregivers developed to prevent child neglect and to reduce child maltreatment
- b. Motivational interviewing (MI): a counseling approach to increase awareness of the potential problems, risks, and consequences of a behavior (e.g., substance use).
- c. DECIDE: a patient activation and self-management intervention to teach ethnic/racial minority patients to take a more active role in their mental health care.
- d. Trauma Focused Cognitive Behavioral Therapy (TF-CBT): manualized EBP to address trauma in youth.
- e. Cognitive Behavioral Therapy (CBT): a mental health intervention that can be used to treat a range of psychiatric disorders.
- f. Prolonged Exposure (PE): a mental health intervention that addresses trauma in adults.
- g. Dialectical Behavior Therapy (DBT): a mental health intervention that targets emotional and behavioral dysregulation.
- h. Child-Parent Psychotherapy (CPP): targets improving the caregiver-child relationship in the context of trauma experienced by the child.
- i. Cognitive Behavioral Intervention for Trauma in Schools (CBITS): a mental health intervention delivered in a group format in schools to target trauma.
- j. Managing and Adapting Practice (MAP): a suite of decision support tools to identify, select, and monitor EBP.
- k. Seeking Safety: integrates CBT principles along with a present-focused, problem-oriented approach to address trauma and substance use.
- l. Triple P Positive Parenting Program: behavioral parent training program delivered in a group or individual format.
- m. Keeping foster and kin parents supported and trained (KEEP): a parenting model designed to teach parenting strategies that optimize child development, particularly within the child welfare system.
- n. Parenting Through Change for Reunification (PTC-R): a parenting model adapted from the Parent Management Training Oregon for biological parents with children in foster care.
- o. Casework practice model (R<sup>3</sup>): a case-work practice model that integrates principles from KEEP and PTC-R into the daily interactions between casework supervisors and caseworkers.
- p. Collaborative Recovery Model: a recovery-oriented model of service delivery.
- q. Brazilian School Food Program (PNAE): National School Feeding Program in Brazil, an integrated food and nutrition security policy
- r. Child Welfare Partnership for Research and Training: a community-engaged framework that includes a continuum of strategies aimed at community engagement in the research process.
- s. Multidimensional Foster Care (MTFC):an EBP that targets out-of-home placements, youth arrests, violence, pregnancy, substance use and mental health problems.
- t. Contextualized Feedback System (CFS): a measurement-feedback system to track clinical outcomes with the goal of improving service delivery
- u. Contingency Management Treatment: a psychosocial intervention based on the principles of behavior modification to reduce substance use.
- v. Medication-Assistant Treatment: a pharmacological intervention to target substance use and may be a supplement to a psychosocial intervention.
- w. Collaborative commissioning: A collaboration between Cambridgeshire and Peterborough Clinical Commissioning Group, local authorities, and other partners which enables broad acceleration of service transformations
- x. Adolescent community reinforcement approach: a behaviorally-based EBP to address adolescent substance use.
- y. Supporting Siblings in Foster Care (SIBS-FC): a psychosocial sibling intervention program for pre-adolescent and adolescent youth in foster care.
- z. Measurement Feedback Systems: a quality improvement tool to electronically track outcomes of health care services.
- aa. HiBalance: a program that targets balance impairments in Parkinson's Disease to improve balance control and gait.
- bb. Project Care: a pilot initiative that offered training, funding, and technical assistance to support integrated behavioral health care in primary care settings
- cc. Mujer Segura (Healthy Woman): Psychoeducational intervention to promote self sex practices
- dd. Prevention of mother-to-child transmission (PMTCT): a treatment protocol to prevent mother-to-child transmission of HIV.
- ee. FOYC: An evidence-based, life skills curriculum designed to reduce risk taking behaviors related to HIV/STI transmission and teen pregnancy.
- ff. ValueOptions New Mexico: Reform of publicly funded behavioral healthcare to reduce costs
- gg. Wraparound: a treatment process that results in a unique set of community services and supports to facilitate individuals with mental illness to remain in their natural environments rather than institutions. This study defined Wraparound using: 3 initiatives: comprehensive community support services (CCSS), clinical homes (CHs), and core service agencies (CSAs)
- hh. RLAS (Implementing School Nursing Strategies to Reduce LGBTQ Adolescent Suicide): an intervention model that builds on EPIS and the Dynamic Adaptation Process to implement EBP strategies in US high schools.
- ii. Cognitive therapy: a mental health therapy that targets a range of psychiatric disorders.
- jj. Cognitive processing therapy: a mental health intervention to target trauma in adults.

## References

1. Aarons GA, Fettes DL, Sommerfeld DH, Palinkas LA: **Mixed methods for implementation research: Application to evidence-based practice implementation and staff turnover in community-based organizations providing child welfare services.** *Child Maltreatment* 2012, **17**:67-79.
2. Aarons GA, Sommerfeld DH: **Leadership, innovation climate, and attitudes toward evidence-based practice during a statewide implementation.** *J Am Acad Child Psy* 2012, **51**:423-431.
3. Green AE, Cafri G, Aarons G: **Job perceptions following statewide evidence-based treatment implementation.** *Journal of Children's Services* 2016, **11**:345-355.
4. Aarons GA, Green AE, Palinkas LA, Self-Brown S, Whitaker DJ, Lutzker JR, Silovsky JF, Hecht DB, Chaffin MJ: **Dynamic adaptation process to implement an evidence-based child maltreatment intervention.** *Implement Sci* 2012, **7**:1-9.
5. Aarons GA, Green AE, Willging CE, Ehrhart MG, Roesch SC, Hecht DB, Chaffin MJ: **Mixed-method study of a conceptual model of evidence-based intervention sustainment across multiple public-sector service settings.** *Implement Sci* 2014, **9**:183.
6. Willging CE, Green AE, Gunderson L, Chaffin M, Aarons GA: **From a "perfect storm" to "smooth sailing": Policymaker perspectives on implementation and sustainment of an evidence-based practice in two states.** *Child Maltreatment* 2015, **20**:24-36.
7. Aarons GA, Green AE, Trott E, Willging C, Torres EM, Ehrhart M, Roesch SC: **The roles of system and organizational leadership in system-wide evidence-based intervention sustainment: A mixed-method study.** *Adm Policy Ment Hlth* 2016, **43**:991-1008.
8. Willging C, Aarons GA, Trott E, Green AE, Finn CV, Ehrhart KH, Hecht D: **Contracting and procurement for evidence-based interventions in public-sector human services: A case study.** *Adm Policy Ment Hlth* 2016, **43**:675-692.
9. Aarons GA, Fettes DL, Hurlburt MS, Palinkas LA, Gunderson L, Willging CE, Chaffin MJ: **Collaboration, negotiation, and coalescence for interagency-collaborative teams to scale-up evidence-based practice.** *J Clin Child Adolesc* 2014, **43**:915-928.
10. Chaffin M, Hecht D, Aarons G, Fettes D, Hurlburt M, Ledesma K: **EBT fidelity trajectories across training cohorts using the Interagency Collaborative Team strategy.** *Adm Policy Ment Hlth* 2016, **43**:144-156.
11. Hurlburt M, Aarons GA, Fettes DL, Willging C, Gunderson L, Chaffin MJ: **Interagency Collaborative Team model for capacity building to scale-up evidence-based practice.** *Children and Youth Services Review* 2014, **39** 160-168.
12. Willging CE, Trott EM, Fettes D, Gunderson L, Green AE, Hurlburt MS, Aarons GA: **Research-supported intervention and discretion among frontline workers implementing home visitation services.** *Research on Social Work Practice* 2017, **27**:664-675.
13. Aarons GA, Ehrhart MG, Moullin JC, Torres EM, Green AE: **Testing the Leadership and Organizational Change for Implementation (LOCI) Intervention in substance abuse treatment: A cluster randomized trial study protocol.** *Implementation Science* 2017, **12**:29.
14. Ault-Brutus A, Lee C, Singer S, Allen M, Alegría M: **Examining implementation of a patient activation and self-management intervention within the context of an effectiveness trial.** *Adm Policy Ment Hlth* 2014, **41**:777-787.
15. Beidas RS, Aarons GA, Barg F, Evans A, Hadley T, Hoagwood K, Marcus S, Schoenwald S, Walsh L, Mandell DS: **Policy to implementation: evidence-based practice in community mental health—study protocol.** *Implement Sci* 2013, **9**:38.
16. Beidas RS, Stewart RE, Adams DR, Fernandez T, Lustbader S, Powell BJ, Aarons GA, Hoagwood KR, Evans AC, Hurford MO, et al: **A multi-level examination of stakeholder perspectives of implementation of evidence-based practices in a large urban publicly-funded mental health system.** *Adm Policy Ment Hlth* 2016, **43**:893-908.
17. Beidas RS, Adams DR, Kratz HE, Jackson K, Berkowitz S, Zinny A, Cliggitt LP, DeWitt KL, Skinner L, Evans A: **Lessons learned while building a trauma-informed public behavioral health system in the city of Philadelphia.** *Eval Program Plann* 2016, **59**:21-32.
18. Beidas RS, Edmunds J, Ditty M, Watkins J, Walsh L, Marcus S, Kendall P: **Are inner context factors related to implementation outcomes in cognitive-behavioral therapy for youth anxiety?** *Adm Policy Ment Hlth* 2014, **41**:788-799.
19. Beidas RS, Marcus S, Aarons GA, Hoagwood KE, Schoenwald S, Evans AC, Hurford MO, Hadley T, Barg FK, Walsh LM, et al: **Predictors of community therapists' use of therapy techniques in a large public mental health system.** *JAMA Pediatrics* 2015, **169**:374-382.
20. Skinner LC, Wolk CB, Stewart RE, Adams DR, Rubin RM, Evans AC, Beidas RS: **Therapist and organizational factors associated with participation in evidence-based practice initiatives in a large urban publicly-funded mental health system.** *The Journal of Behavioral Health Services & Research* 2018, **45**:174-186.
21. Brookman-Frazee L, Stadnick N, Roesch S, Regan J, Barnett M, Bando L, Innes-Gomberg D, Lau A: **Measuring sustainment of multiple practices fiscally mandated in children's mental health services.** *Adm Policy Ment Health* 2016, **43**:1009-1022.
22. Lau AS, Brookman-Frazee L: **The 4KEEPS study: identifying predictors of sustainment of multiple practices fiscally mandated in children's mental health services.** *Implement Sci* 2016, **11**:31.
23. Chamberlain P: **Toward creating synergy among policy, procedures, and implementation of evidence-based models in child welfare systems: two case examples.** *Clin Child Fam Psychol Rev* 2017, **20**:78-86.
24. Collins-Camargo C, Garstka TA: **Promoting outcome achievement in child welfare: predictors of evidence-informed practice.** *J Evid Based Soc Work* 2014, **11**:423-436.
25. Deane FP, Andresen R, Crowe TP, Oades LG, Ciarrochi J, Williams V: **A comparison of two coaching approaches to enhance implementation of a recovery-oriented service model.** *Adm Policy Ment Hlth* 2014, **41**:660-667.
26. de Melo MNT, de Sá RMPF, Filho DAM: **Sustainability of an innovative school food program: a case study in the northeast of Brazil.** *SciELO Public Health* 2016, **21**:1899-1908.
27. Drabble L, Lemon K, D'Andrade A, Donoviel B, Le J: **Child welfare partnership for research and training: a title IV-E university/community collaborative research model.** *Journal of Public Child Welfare* 2013, **7**:411-429.
28. Drahota A, Aarons GA, Stahmer AC: **Developing the Autism Model of Implementation for Autism spectrum disorder community providers: study protocol.** *Implement Sci* 2012, **7**:1-10.
29. Edmunds JM, Read KL, Ringle VA, Brodman DM, Kendall PC, Beidas RS: **Sustaining clinician penetration, attitudes and knowledge in cognitive-behavioral therapy for youth anxiety.** *Implement Sci* 2014, **9**:89.
30. Garcia AR, Kim M, Palinkas LA, Snowden L, Landsverk J: **Socio-contextual determinants of research evidence use in public-youth systems of care.** *Adm Policy Ment Hlth* 2016, **43**:569-578.
31. Palinkas LA, Qiaobing W, Fuentes D, Finno-Velasquez M, Holloway IW, Garcia A, Chamberlain P: **Innovation and the use of research evidence in youth-serving systems: a mixed-methods study.** *Child Welfare* 2015, **94**:57-85.
32. Gadowski AM, Wissow LS, Palinkas L, Hoagwood KE, Daly JM, Kaye DL: **Encouraging and sustaining integration of child mental health into primary care: interviews with primary care providers participating in Project TEACH (CAPES and CAP PC) in NY.** *Gen Hosp Psychiatry* 2014, **36**:555-562.
33. Gates LB, Hughes A, Kim DH: **Influence of staff attitudes and capacity on the readiness to adopt a career development and employment approach to services in child welfare systems.** *Journal of Public Child Welfare* 2015, **9**:323-340.
34. Gleacher AA, Olin SS, Nadeem E, Pollock M, Ringle V, Bickman L, Hoagwood K: **Implementing a measurement feedback system in community mental health clinics: a case study of multilevel barriers and facilitators.** *Adm Policy Ment Hlth* 2016:1-15.
35. Goldstein H, Olszewski A: **Developing a phonological awareness curriculum: reflections on an implementation science framework.** *J Speech Lang Hear Res* 2015, **58**:S1837-1850.
36. Green AE, Aarons GA: **A comparison of policy and direct practice stakeholder perceptions of factors affecting evidence-based practice implementation using concept mapping.** *Implement Sci* 2011, **6**:104.
37. Guerrero EG, He A, Kim A, Aarons GA: **Organizational implementation of evidence-based substance abuse treatment in racial and ethnic minority communities.** *Adm Policy Ment Hlth* 2014, **41**:737-749.
38. Guerrero EG, Andrews C, Harris L, Padwa H, Kong Y, M.S.W. KF: **Improving coordination of addiction health services organizations with mental health and public health services.** *J Subst Abuse Treat* 2016, **60**:45-53.
39. Horwitz SM, Hurlburt MS, Goldhaber-Fiebert JD, Palinkas LA, Rolls-Reutz J, Zhang J, Fisher E, Landsverk J: **Exploration and adoption of evidence-based practice by US child welfare agencies.** *Child Youth Serv Rev* 2014, **39**:147-152.
40. Humphrey A, Eastwood L, Atkins H, Vainre M, Lea-Cox C: **An exemplar of GP commissioning and child and adolescent mental health service partnership: Cambridge 1419 young people's service.** *Journal of Integrated Care* 2016, **24**:26-37.
41. Hunter SB, Han B, Slaughter ME, Godley SH, Garner BR: **Associations between implementation characteristics and evidence-based practice sustainment: a study of the Adolescent Community Reinforcement Approach.** *Implement Sci* 2015, **10**:173.
42. Kothari BH, McBeath B, Lamson-Siu E, Webb SJ, Sorenson P, Bowen H, Waid J, Bank L: **Development and feasibility of a sibling intervention for youth in foster care.** *Eval Program Plann* 2014, **47**:91-99.

43. Kotte A, Hill KA, Mah AC, Korathu-Larson PA, Au JR, Izmirian S, Keir SS, Nakamura BJ, Higa-McMillan CK: **Facilitators and barriers of implementing a measurement feedback system in public youth mental health.** *Adm Policy Ment Hlth* 2016, **43**:861-878.
44. Knight DK, Belenko S, Wiley T, Robertson AA, Arrigona N, Dennis M, Bartkowski JP, McReynolds LS, Becan JE, Knudsen HK, et al: **Juvenile Justice—Translational Research on Interventions for Adolescents in the Legal System (JJ-TRIALS): a cluster randomized trial targeting system-wide improvement in substance use services.** *Implementation Science* 2016, **11**:57.
45. Lambert D, Richards T, Merrill T: **Keys to implementation of child welfare systems change initiatives.** *Journal of Public Child Welfare* 2016, **10**:132-151.
46. Leavy B, Kwak L, Hagströmer M, Franzén E: **Evaluation and implementation of highly challenging balance training in clinical practice for people with Parkinson's disease: protocol for the HiBalance effectiveness-implementation trial.** *BMC Neurology* 2017, **17**:27.
47. Nadeem E, Weiss D, Olin SS, Hoagwood KE, Horwitz SM: **Using a theory-guided learning collaborative model to improve implementation of EBPs in a state children's mental health system: a pilot study.** *Adm Policy Ment Health* 2016, **43**:978-990.
48. Nadeem E, Ringle VA: **De-adoption of an evidence-based trauma intervention in schools: A retrospective report from an urban school district.** *School Mental Health* 2016, **8**:132-143.
49. Padwa H, Teruya C, Tran E, Lovinger K, Antonini VP, Overholt C, Urada D: **The implementation of integrated behavioral health protocols in primary care settings in Project Care.** *J Subst Abuse Treat* 2016, **62**:74-83.
50. Palinkas LA, Fuentes D, Finno M, Garcia AR, Holloway IW, Chamberlain P: **Inter-organizational collaboration in the implementation of evidence-based practices among public agencies serving abused and neglected youth.** *Adm Policy Ment Health* 2014, **41**:74-85.
51. Patterson TL, Semple SJ, Chavarin CV, Mendoza DV, Santos LE, Chaffin M, Palinkas L, Strathdee SA, Aarons GA: **Implementation of an efficacious intervention for high risk women in Mexico: protocol for a multi-site randomized trial with a parallel study of organizational factors.** *Implement Sci* 2012, **7**:105.
52. Palinkas LA, Chavarin CV, Rafful CM, Um MY, Mendoza DV, Staines H, Aarons GA, Patterson TL: **Sustainability of evidence-based practices for HIV prevention among female sex workers in Mexico.** *PLOS ONE* 2015, **10**:e0141508.
53. Peltzer K, Prado G, Horigian V, Weiss S, Cook R, Sifunda S, Jones D: **Prevention of mother-to-child transmission (PMTCT) implementation in rural community health centres in Mpumalanga province, South Africa.** *Journal of Psychology in Africa* 2016, **26**:415-418.
54. Rieckmann T, Moore LA, Croy CD, Novins DK, Aarons G: **A national study of American Indian and Alaska Native substance abuse treatment: provider and program characteristics.** *J Subst Abuse Treat* 2016.
55. Moore LA, Aarons GA, Davis JH, Novins DK: **How do providers serving American Indians and Alaska Natives with substance abuse problems define evidence-based treatment?** *Psychol Serv* 2015, **12**:92-100.
56. Dickerson D, Moore LA, Rieckmann T, Croy CD, Venner K, Moghaddam J, Gueco R, Novins DK: **Correlates of motivational interviewing use among substance use treatment programs serving American Indians/Alaska Natives.** *The Journal of Behavioral Health Services & Research* 2018, **45**:31-45.
57. Rye M, Torres EM, Friberg O, Skre I, Aarons GA: **The Evidence-based Practice Attitude Scale-36 (EPBAS-36): a brief and pragmatic measure of attitudes to evidence-based practice validated in Norwegian and U.S. samples.** *Implement Sci* 2017.
58. Stroobants T, Vanderfaeillie J, Andries C, Van Holen F: **Youth care workers' perspectives on and adoption of evidence-based practice.** *Children and Youth Services Review* 2016, **71**:299-307.
59. Walker SC, Whitener R, Trupin EW, Migliarini N: **American Indian perspectives on evidence-based practice implementation: results from a statewide Tribal Mental Health Gathering.** *Adm Policy Ment Health* 2015, **42**:29-39.
60. Wang B, Stanton B, Deveaux L, Lunn S, Rolle G, Adderley R, Poitier M, Koci V, Marshall S, Gomez P: **Multi-year school-based implementation and student outcomes of an evidence-based risk reduction intervention.** *Implement Sci* 2017, **12**:16.
61. Willging CE, Sommerfeld DH, Aarons GA, Waitzkin H: **The effects of behavioral health reform on safety-net institutions: A mixed-method assessment in a rural state.** *Adm Policy Ment Hlth* 2014, **41**:276-291.
62. Willging CE, Lamphere L, Rylko-Bauer B: **The transformation of behavioral healthcare in New Mexico.** *Adm Policy Ment Hlth* 2015, **42**:343-355.
63. Willging CE, Green AE, Ramos MM: **Implementing school nursing strategies to reduce LGBTQ adolescent suicide: a randomized cluster trial study protocol.** *Implement Sci* 2016, **11**:145.
64. Williams JR, Blais MP, Banks D, Dusablon T, Williams WO, Hennessy KD: **Predictors of the decision to adopt motivational interviewing in community health settings.** *The Journal of Behavioral Health Services & Research* 2014, **41**:294-307.
65. Stirman SW, Matza A, Gamarra J, Toder K, Xhezo R, Evans AC, Hurford M, Beck AT, Crits-Christoph P, Creed T: **System-level influences on the sustainability of a cognitive therapy program in a community behavioral health network.** *Psychiatr Serv* 2015, **66**:734-742.
66. Wiltsey Stirman S, Finley EP, Shields N, Cook J, Haine-Schlagel R, Burgess JF, Dimeff L, Koerner K, Suvak M, Gutner CA, et al: **Improving and sustaining delivery of CPT for PTSD in mental health systems: a cluster randomized trial.** *Implement Sci* 2017, **12**:32.
67. Zimmerman L, Lounsbury DW, Rosen CS, Kimerling R, Trafton JA, Lindley SE: **Participatory system dynamics modeling: increasing stakeholder engagement and precision to improve implementation planning in systems.** *Adm Policy Ment Health* 2016, **43**:834-849.
